# Supplementary material for: Intranasal Delivery of Cell-Penetrating Therapeutic Peptide Enhances Brain Delivery, Reduces Inflammation, and Improves Neurologic Function in Moderate TBI
Source: Preprints.org preprint supplement (doi:10.20944/preprints202405.0360.v1), 2024-05-07
Supplement: Supplementary file 1 [file supplementary]

Archive with 1 entries (1 files):
- KAFAK Supplemental Data.pdf
