# Supplementary material for: Intranasal Delivery of Cell-Penetrating Therapeutic Peptide Enhances Brain Delivery, Reduces Inflammation, and Improves Neurologic Function in Moderate TBI
Source: Preprints.org preprint supplement (doi:10.20944/preprints202405.0360.v1), 2024-05-07
Supplement: Supplementary file 1 [file supplementary › KAFAK Supplemental Data.pdf]

## Supplemental Data

Intranasal delivery of cell-penetrating therapeutic peptide enhances brain delivery, reduces inflammation, and improves neurologic function in moderate TBI

Yaswanthi Yanamadala<sup>1</sup>, Ritika Roy<sup>1</sup>, Afrika Williams<sup>1</sup>, Navya Uppu<sup>1</sup>, Audrey Yoonsun Kim<sup>2</sup>, Mark A. DeCoster<sup>1</sup>, Paul Kim<sup>2</sup>, Teresa Ann Murray<sup>1\*</sup>

<sup>1</sup>Center for Biomedical Engineering and Rehabilitation Sciences, Louisiana Tech University; <sup>2</sup> Department of Biological Sciences, Grambling State University

\*Corresponding author: tmurray@latech.edu

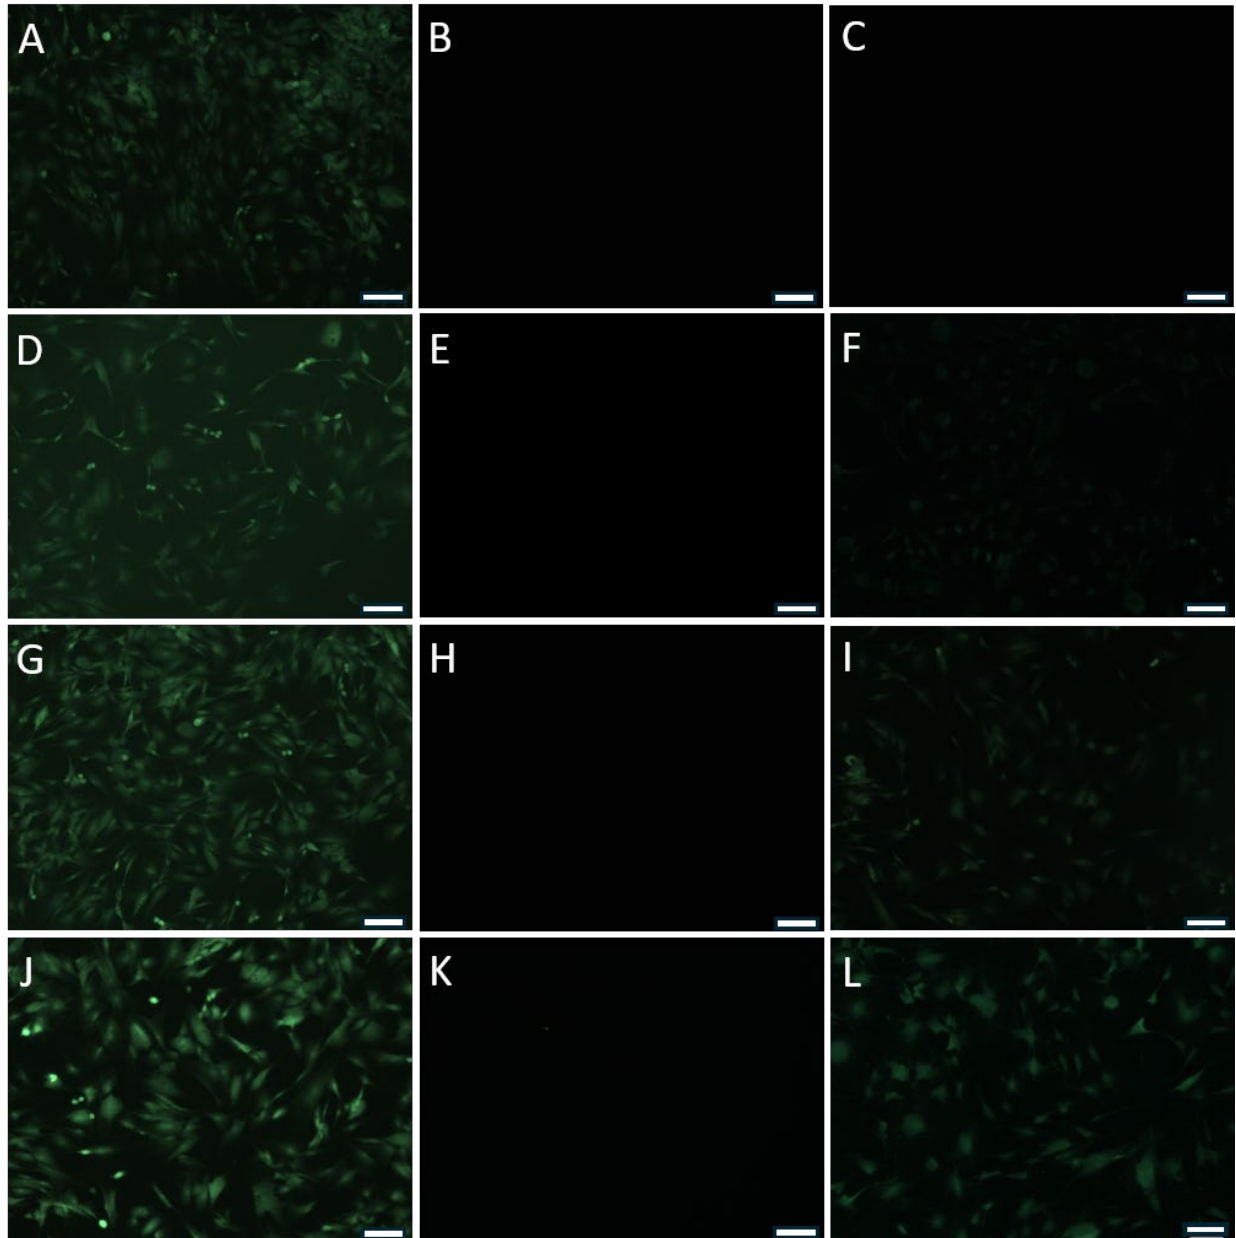

**Figure S1.** Representative images showing the uptake levels of FITC-labeled peptides in BMVECs after 4 hours of treatment with varying concentrations of peptides. The cells in the first column (A, D, G, J) were treated with FITC-KAFAK, the cells in the second column (B, E, H, K) were treated with FITC-AIP-1, and the cells in the third column (C, F, I, L) were treated with FITC-L57-AIP-1. Cells in the top row (A-C) were incubated with 20  $\mu$ M of the respective treatment. The next three rows are representative images of cells treated with 30, 50 and 75  $\mu$ M of the respective treatment (second, third and fourth rows, respectively). Scale bars denote 100 $\mu$ m.
